1 Ranging patterns of the rainforest-adapted lion-tailed macaque *Macaca silenus* in a human-  
2 dominated landscape in the Anamalai hills of the Western Ghats, India

3  
4  
5  
6

7 ASHNI KUMAR DHAWALE<sup>1,2^¶\*</sup> and ANINDYA SINHA<sup>1,3,4#¶</sup>

8  
9  
10  
11  
12  
13

14 <sup>1</sup> *Animal Behaviour and Cognition Programme, National Institute of Advanced Studies,*  
15 *Bangalore, India*

16 <sup>2</sup> *University of Trans-Disciplinary Health Sciences and Technology, Bangalore, India*

17 <sup>3</sup> *Indian Institute of Science Education and Research, Kolkata, India*

18 <sup>4</sup> *Centre for Wildlife Studies, Bangalore, India*

19  
20

21 <sup>^</sup> ORCID ID: 0000-0002-7185-9870

22 <sup>#</sup> ORCID ID: 0000-0001-5623-711X

23  
24

25 Running title: *Ranging patterns of rainforest primate in a human-dominated landscape*

26  
27

28 ¶ These authors contributed equally to this work

29  
30

31 *\*Corresponding author:*

32 E-mail: ashnidhawale@gmail.com

33 Phone: +91 9930432371

34

35 **Abstract**

36 The ranging patterns of five lion-tailed macaque *Macaca silenus* troops, forming the  
37 Puthuthottam sub-population, were studied over a three year period to determine  
38 road/habitation visitation rate, home ranges and habitat preference. Each troop visited the road  
39 or human habitation at varying rates, with the largest troop visiting most frequently. Home  
40 ranges sizes were observed to be highly reduced when compared to wild populations, and also  
41 greatly varied across troops, with relatively low overlap given the macaque density in the  
42 available area. All five macaque troops showed a preference for human-modified habitats such  
43 as roads and human settlements where anthropogenic food was easily available. Our study  
44 shows an increasing dependence amongst members of the Puthuthottam troops on  
45 anthropogenic foods, which has led to many threats faced by individuals including fatal  
46 collisions with vehicular traffic and electrocutions.

47

48

49

50

51

52

53

54

## 55 Introduction

56 Animal movements in a landscape are largely determined by the availability and distribution  
57 of food, predation risk, intra- and inter- species competition, reproductive investments and  
58 behavioural adaptations (Clutton-Brock, 1975; Pontzer & Kamilar, 2009; South, 1999; Wiens  
59 et al., 1993), all of which are heavily influenced by human disturbance. Globally, natural  
60 habitats are being razed for agricultural purposes, having already resulted in the loss of up to  
61 50% of forest land (Defries et al., 2004). The resultant fragmentation of natural habitats into  
62 isolated patches is known to drastically affect the spatial movement of animals, often restricting  
63 them to certain areas beyond which the habitat becomes impermeable (Andren, 1994; Bladon  
64 et al., 2002; Mborá et al., 2009). Patch resource quality and heterogeneity directly influences  
65 animal home range (Levins, 1968; Rolstad, 1999), which is typically defined as the total area  
66 used by an individual or group (Jay, 1965). Additionally, fragmentation indirectly shapes  
67 ranging behaviour through the introduction of unnatural features into the landscape, such as  
68 linear intrusions and barriers (Jakes et al., 2018). Ranging behaviour, thus, becomes a useful  
69 tool to capture the interactions of animals with their changing environment, especially insofar  
70 as human activity is concerned.

71 Humans developmental activities directly and indirectly impact the ranging behaviour of  
72 animals. For example, the construction in windfarms in Scotland caused resident Golden eagles  
73 *Aquila crysaetos* to change their ranging in order to avoid the manmade structures (Walker et  
74 al., 2005). The red fox *Vulpes vulpes* selectively used human-dominated areas in Central Italy,  
75 based on the tolerance exhibited by people towards them (Lucherini et al., 1995). Another  
76 species from Central Italy, the Least weasel *Mustela nivalis* showed a strong preference for  
77 remnant natural habitats, such as hedges, in a predominantly agricultural landscape (Magrini  
78 et al., 2009). A species of stone curlew *Burhinus oedicnemus* in southern England preferentially  
79 chose breeding grounds that were greater than three kilometres from a major road (R. E. Green  
80 et al., 2000). Home range expansion was observed to be multi-fold in some populations of  
81 South Andean deer *Hippocamelus bisulcus* in response to hunting and other such human  
82 disturbances in Chilean Patagonia (Gill et al., 2008). Closer to home, in the Western Ghats of  
83 India, movement patterns of many large mammals including the Asian elephant *Elephas*  
84 *maximus*, spotted deer *Axis axis* and tiger *Panthera tigris* are radically affected by linear  
85 intrusions such as pipelines, railway tracks, electric wires and fences (Menon et al., 2013;  
86 Nayak et al., 2020).

87 Of the many mammals impacted by human activity, primates perhaps have the longest history  
88 of interactions with humans and human habitations. For example, the Bonnet macaque *Macaca*  
89 *radiata*, endemic to peninsular India, has featured in literature from 2000 years ago, being  
90 described as a regular fixture in the town's commons ( see Sinha, 2001 for source). With a  
91 population of 2 billion people in primate range countries, as of 2005 (Estrada et al., 2012), it is  
92 hardly surprising that primates across the world are increasingly encountering humans and their  
93 infrastructure. In fact, many species the world over, are able to persist in agroecosystems, or  
94 habitats dominated by crops but having some remnant natural vegetation (Estrada et al., 2006,  
95 2012). These trends, however, are usually observed in primate species that show a high  
96 propensity for adapting to human-dominated landscapes, such as habitat generalists or species  
97 that are non-reliant on dense canopy for movement. Even those that find their way through a  
98 human-modified habitat matrix, and are able to exploit new food sources or find shelter  
99 (Adhikari et al., 2018; Estrada et al., 2012; Ganguly & Chauhan, 2018; Nijman, 2021), face  
100 numerous caveats including intra-species and human-primate conflict (Defries et al., 2004;  
101 Jaman & Huffman, 2013; Radhakrishna & Sinha, 2011; Ram et al., 2003; Riley, 2007; Sinha  
102 et al., 2005; Tracie, 2011; Warren et al., 2011), fatal encounters with vehicles , increased  
103 parasite load (Hussain et al., 2013; Mborera et al., 2009) and hunting pressures (Gill et al., 2008;  
104 Richard-Hansen, 2000).

105 These caveats are especially pronounced in those primate species that display a further  
106 specialisation in their ecology or behaviour. For example, the highly arboreal proboscis  
107 monkey *Nasalis larvatus* completely avoided clear-felled habitats surrounding human  
108 habitation (Salter et al., 1985) and abandoned roosting sites along riversides where tourism-  
109 associated infrastructure was established (Marsh & Chapman, 2013). The Yunnan snub-nosed  
110 monkey, inhabiting the highest elevation of any non-human primate species, displayed greatly  
111 varied daily movements in response to severe human disturbance, which were further  
112 exacerbated by the seasonality of natural food resources (Li et al., 2020). The habitat-specialist  
113 diademed sifaka *Propithecus diadema* showed a drastically reduced home range size and daily  
114 path length in fragmented habitats (Irwin, 2008). A similar trend was observed in frugivorous  
115 primates, such as the moustached guenon *Cercopithecus cephus* and hoolock gibbon *Hylobates*  
116 *hoolock* and *Hylobates agilis* (Yanuar & Chivers, 2010), wherein home range size in  
117 fragmented habitats is drastically reduced. This pattern could perhaps be explained by the  
118 surrounding human-dominated matrix creating a “hard edge”, restricting the species entirely

119 within the fragment, as is the case with the highland mangabey *Rungwecebus kipunji* in  
120 Tanzania (Bracebridge et al., 2013). It is also noteworthy that folivorous species that have  
121 inherently small home ranges tend to fare better in fragmented habitats, as they are able to  
122 maximise resources within restricted areas (Yanuar & Chivers, 2010).

123 The lion-tailed macaque *Macaca silenus*, while belonging to the highly adaptable genus of  
124 macaques, has been categorised as an arboreal, primarily frugivorous, habitat-specialist  
125 species, dependent on the wet evergreen native vegetation type (Kumar, 2013). This is a species  
126 endemic to the Western Ghats, existing today in 49 subpopulations, in only eight key locations,  
127 including the Anamalai Hills (Kumara & Singh, 2003; Kurup & Kumar, 1993; Molur et al.,  
128 2003). Since the late 1800s, logging of the native vegetation for the expansion of commercially  
129 grown tea and coffee plantations on the Valparai plateau in the Anamalai hills has resulted in  
130 forest fragmentation and the isolation of lion-tailed macaque troops now scattered within these  
131 remaining pockets of rainforest (Jeganathan et al., 2018; Singh et al., 2002). Despite the  
132 degraded nature of these remaining habitats, the Anamalai hills, being contiguous with  
133 Parambikulam Tiger Reserve and Neliampathy in the North, and the Chalakudi hills in the  
134 south, has been identified as a crucial landscape for the conservation of the lion-tailed macaque  
135 (Singh et al., 2002).

136 The Valparai plateau is a matrix of tea and coffee plantations interspersed with 45 rainforest  
137 fragments ranging in size from <10ha to >100ha (Mudappa & Shankar Raman, 2007;  
138 Umopathy & Kumar, 2000). In the surrounding shola forest of Varagaliyar, lion-tailed macaque  
139 groups are reported to maintain a home range of 131ha, while covering 10.75ha and moving  
140 between 0.75km to 2.5km on a daily basis (Kurup & Kumar, 1993). In contrast, this study  
141 focuses on one of the larger forest fragments in the Valparai plateau, measuring 92ha. The  
142 Puthuthottam forest fragment, neighbouring the town of Valparai, and surrounded on all other  
143 sides by tea-plantations, contains ~190 lion-tailed macaque individuals divided into five troops.  
144 All of the five troops present in the Puthuthottam forest fragment visit human habitations, either  
145 labour lines within the fragment or the neighbouring town of Valparai (Dhawale Pers. Obs.).

146 Troops in this population already exhibit adaptations to these anthropogenic habitats,  
147 significantly reducing time spent foraging while increasing time spent resting, and display  
148 altered social dynamics under regimes of potentially perceived competition in the presence of

149 human-use foods (Dhawale et al., 2020). Like many other macaque species (Greenwood,  
150 1980), male lion-tailed macaques typically disperse from the natal troop at sexual maturity.  
151 This dispersal pattern is thought to reduce inbreeding in species (Moore, 1992), thus playing a  
152 crucial role in their long-term survival. In fragmented landscapes like the Valparai plateau,  
153 however, male migration in lion-tailed macaques is severely impeded (Singh et al., 2002). As  
154 a result, males tend to stay back in the natal troops, which has led to an unusual multimale/  
155 multifemale social organisation in the troops present in Puthuthottam (Dhawale, pers. obs.).  
156 Given these relatively recent shifts in the species' ecology and behaviour in this particular  
157 population, we sought to examine the ranging behaviour, and habitat use and preference of the  
158 five Puthuthottam troops, as they traversed over a human-dominated habitat matrix.

## 159 **Objective and Questions**

160 Examining movement, habitat use and competition across the multiple lion-tailed macaque  
161 troops residing in Puthuthottam forest fragment through ranging behaviour.

- 162 1) How does the home range differ between troops and across field seasons?  
163
- 164 2) How much overlap is observed across troop core- and outer- home ranges?  
165
- 166 3) What is the degree of movement for each troop per day over the study period?  
167
- 168 4) What pattern of habitat use is observed by the Puthuthottam population over the study  
169 period?  
170

171

## 172 **Methods**

### 173 **Field Methods**

174 GPS locations were taken at the centre of two pre-determined marker adult females of the troop  
175 at 15 min intervals during the simultaneous and systematic following of all troops present in  
176 the Puthuthottam forest fragment, as they ranged over both natural and anthropogenic habitats.

177 Data was collected for  $8\pm 1$  months (over  $14\pm 1.7$  days/ month) for each season (September to  
178 May), on each of the five troops present in Puthuthottam from 2018 to 2021. A total of ~5000  
179 location data points were collected with  $250\pm 100$  data points per month.

#### 180 *Habitation Visitation Rate*

181 The Puthuthottam highway and human settlements were monitored continuously for 12 months  
182 between October 2018-October 2019, with a GPS location recorded at every encounter with  
183 any troop present in Puthuthottam. If the troop continued to remain by the human habitation,  
184 the GPS record was repeated at 15 min intervals. These locations were later mapped to describe  
185 the patterns of road visitation by the lion-tailed macaques in the Puthuthottam population.

#### 186 *Home range estimation, overlap and habitat use*

187 GPS locations over the field seasons and total study period were mapped using GIS software  
188 to calculate distances travelled, directions of movement and rates of ranging across and outside  
189 the study area for each troop. Such an analysis is essential to map the new-found home range  
190 of these macaque troops, particularly in so far as they overlap with human habitations, orchards  
191 and roads, potential areas for escalated human-primate conflict.

#### 192 **Analysis**

193

#### 194 *Habitation Visitation Rate*

195

196 A habitation visitation rate was calculated as the proportion of days over the monitoring period  
197 during which lion-tailed macaques were encountered near roads or human settlements (adapted  
198 from Singh 2001).

199

200

#### 201 *Home range estimation and overlap:*

202

203 A kernel density estimation (Laver & Kelly, 2008) allowed us to determine outer home range  
204 (95% use area) and core use area (50% use area), using an optimal bandwidth selection method  
205 to delineate kernels from Fotheringham et al., 2000. KDE calculations and visualisation were  
206 completed in QGIS (QGis, 2011 version 2.18.3) using the Heatmap plugin. Additionally we

207 visually present overlap of home range across all troops in Puthuthottam to describe prevailing  
208 inter-troop competition.

209

210

211 *Degree of movement:*

212

213 Daily paths were calculated for each troop over each field season in QGIS (QGis, 2011 version  
214 2.18.3) and their lengths presented as average per troop per field season.

215

216

217 *Habitat Use and Preference:*

218 To describe habitat use and preference, troop locations were sampled such that a single unique  
219 location was considered per day over the entire study period, and compared to a randomly  
220 generated set of points of comparable sample size using a non-parametric test (Wilcoxon Test)  
221 in R, revised version 3.2.4. The random points were weighted as density dependent, based on  
222 the available area of any given habitat type using QGIS (QGis, 2011 version 2.18.3).  
223 Additionally, the study area was rasterized such that each raster pixel (50mx50m) contained a  
224 corresponding 'Habitat Type' value and the frequency of each habitat type (available area) was  
225 compared to the sampled troop locations to provide a visual comparison of availability versus  
226 use.

227 All graphs were created in R, revised version 3.2.4. The habitat types considered are as follows:

228 *Forest Edge:* A 50-m-wide belt around the edge of the Puthuthottam forest fragment,  
229 containing native and non-native tree species and bordered on one side by a national highway.  
230 We chose to demarcate the boundary at 50m from the edge as we observed that the troop spread  
231 at any given time was  $\leq 50\text{m}$ . This habitat contained Natural food sources, and occasionally  
232 Human-use foods, either dropped along the roadside or in the form of handouts provided by  
233 tourists.

234 *Forest Interior:* An area of forest contained by the Forest Edge, described above, consisting of  
235 native and non-native tree species, all of which constituted Natural food sources.



236 *Open Forest Patch*: A relatively open space, largely without canopy cover, present within the  
237 Puthuthottam forest and recently planted with coffee saplings. It included only Natural food  
238 sources.

239 *Human Settlement*: Six separate human habitations were present within and surrounding the  
240 Puthuthottam forest fragment, including two high-density towns, three labour lines housing  
241 plantation workers, and a hospital building. These areas were considered as Human Settlement  
242 habitat type which was characterised by the presence of both Natural and Human-origin food  
243 resources.

244 *Puthuthottam Road*: The section of the Puthuthottam Highway beginning from the Human  
245 Settlements to the north of the forest fragment and ending at the southern end of the forest  
246 fragment.

## 247 **Results**

### 248 **Habitation Visitation Rate**

249 Each of the five troops visited habitation at varied rates (Figure 1), with the BT troop and RT  
250 troop visiting habitation most frequently. The overall habitation visitation rate was calculated  
251 to be 0.57 times a day.

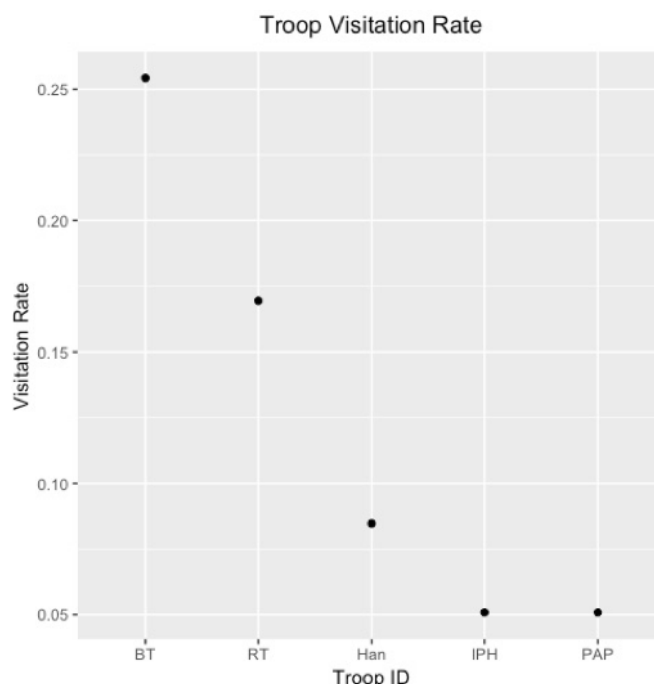

252 **Fig 1.** Habitat visitation rate of the five Puthuthottam troops during October 2018-October 2019

253

254 **Outer- and core- home range**

255 Figure 2 depicts the home ranges for each field season (Sept 2018-May 2019; Aug 2019-Apr  
256 2020; Oct 2020-Mar 2021) of all troops present in Puthuthottam. Three of the troops were  
257 present for only a few of the field seasons due to fission-fusion and reforming of certain troops.  
258 Home ranges varied both across field seasons and troops. The home range of the biggest troop,  
259 BT, seemed to expand over the three field seasons while the RT home range seemed to become  
260 concentrated in certain areas. NTT, a troop which formed when two smaller troops joined  
261 together, seemed to show the most varied home range over field seasons. Figure 3 depicts the  
262 overall home range of each troop measured over the entire study period. Three of the troops,  
263 namely BT, PAP and HAN ranged primarily over the southern part of the forest fragment,  
264 while the other two troops, NTT and RT, were mostly observed in the northern part of the  
265 fragment. Table 1 contains the overall home range sizes of each troop. The largest troop, BT,  
266 also had the largest home range, however, the smallest troop, HAN, did not have the smallest  
267 home range. Figure 4 shows the correlation between total home range area and total troop size.  
268 There is a slight correlation between home range and troop size (Spearman rank correlation,  
269  $R= 0.6$ ,  $p=0.35$ ), and home range and number of adult males per troop (data not shown),  
270 however, these were not statistically significant.

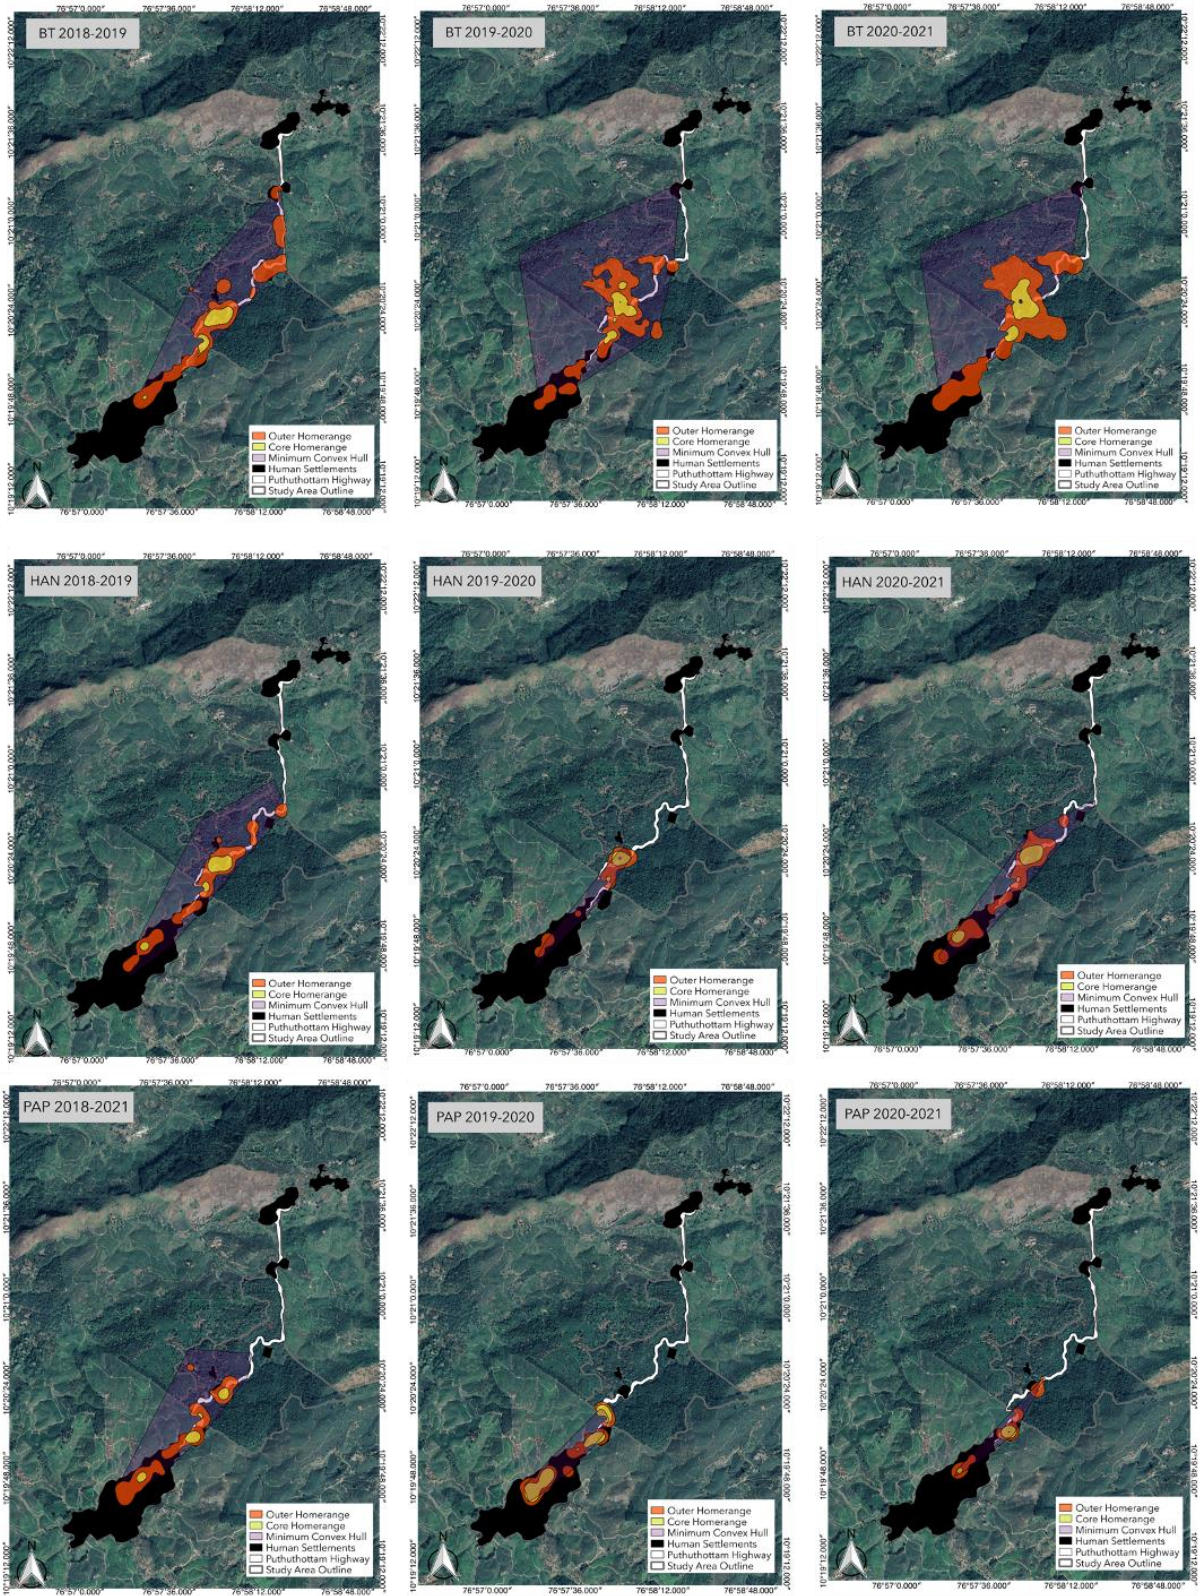



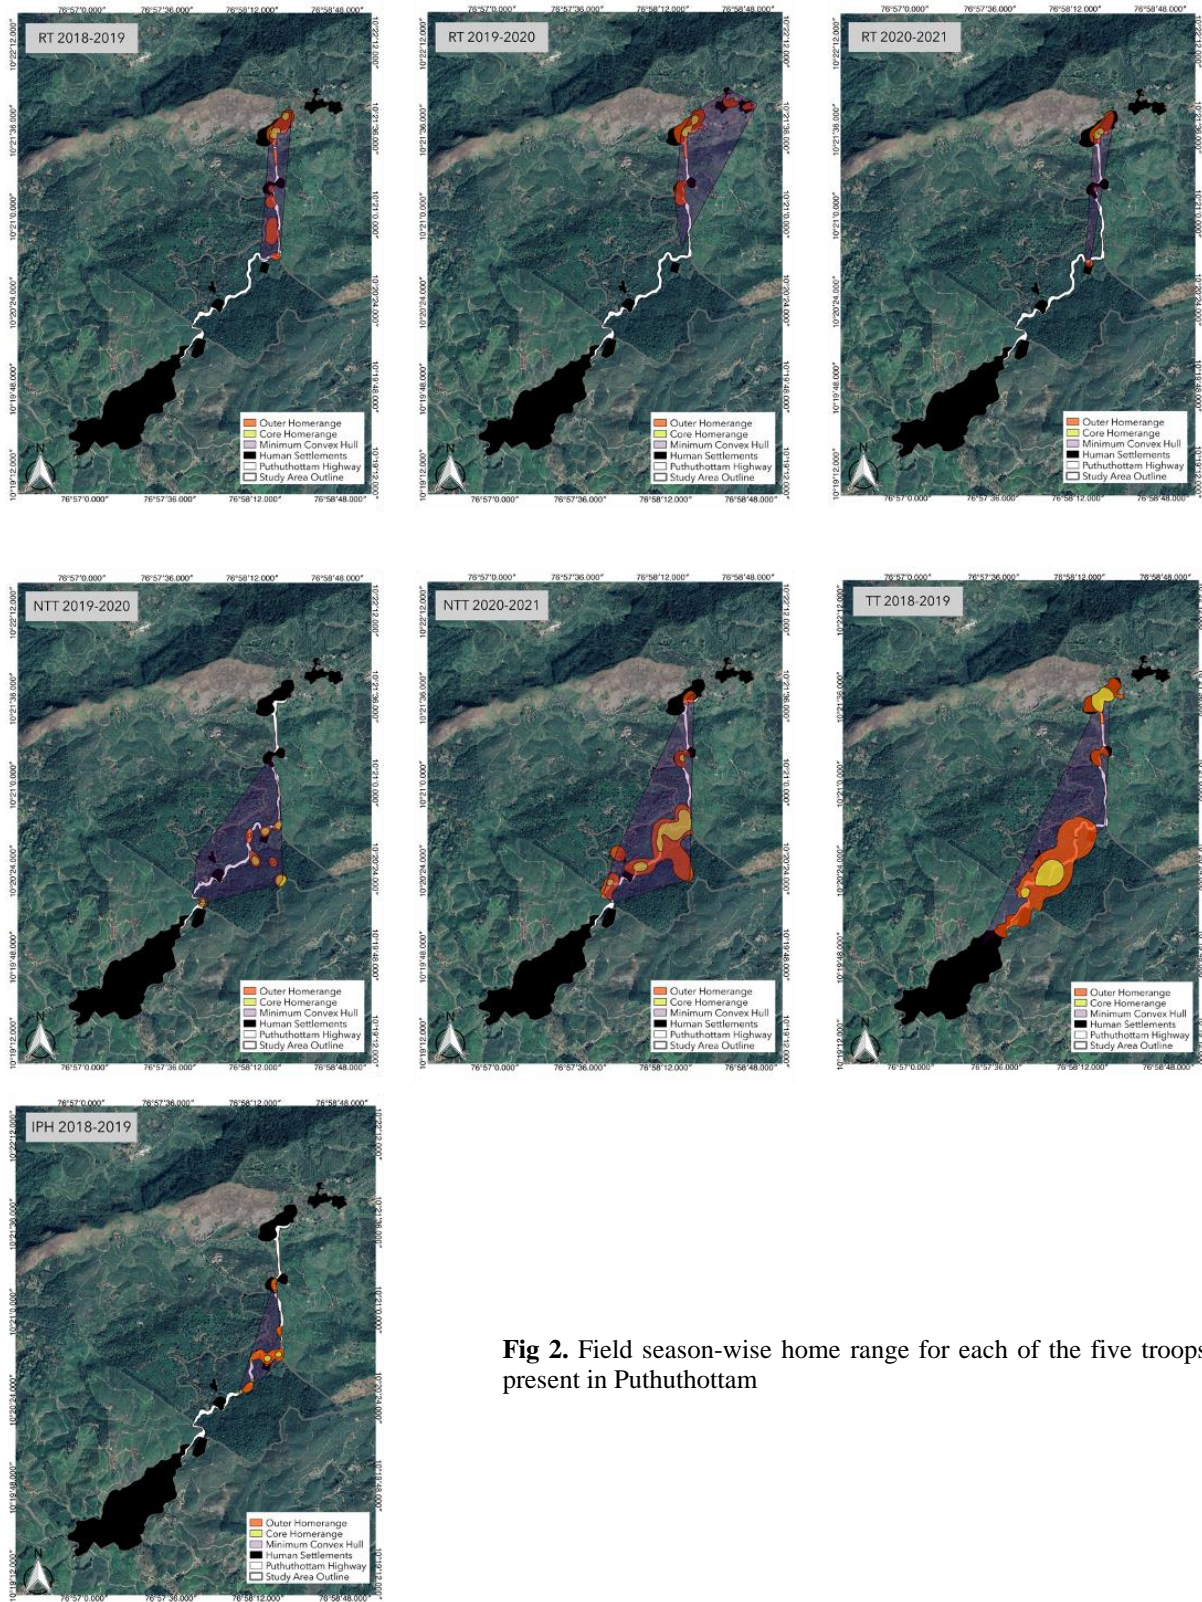

**Fig 2.** Field season-wise home range for each of the five troops present in Puthuthottam



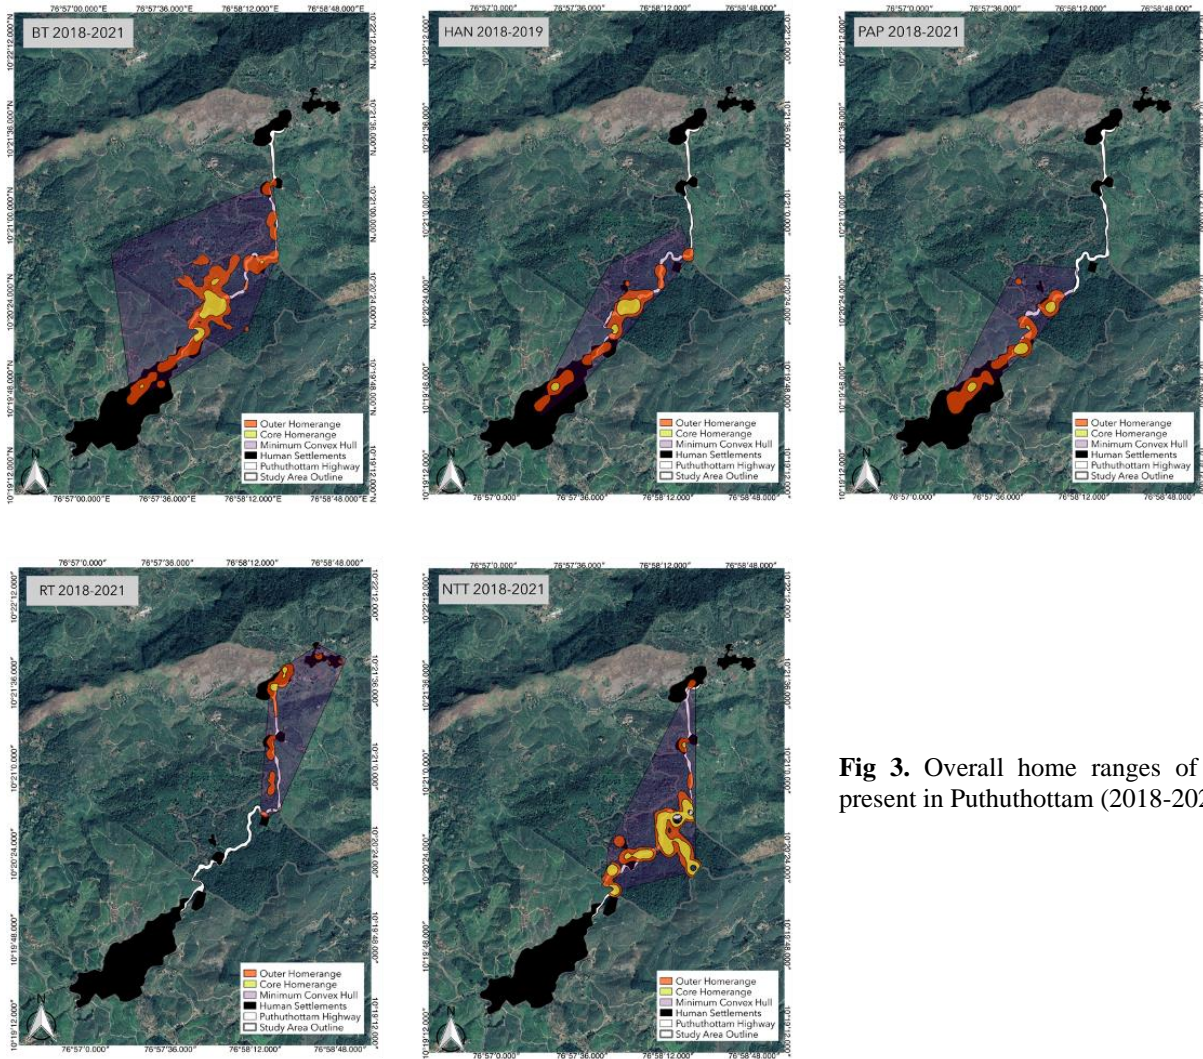

**Fig 3.** Overall home ranges of all troops present in Puthuthottam (2018-2021)

273

274

275

**Table 1.** Overall home range sizes (ha) of all troops in Puthuthottam 2018-2021

| TROOP NAME | OUTER-HOME RANGE | CORE-HOME RANGE | TOTAL |
|------------|------------------|-----------------|-------|
| BT         | 297.9            | 11.2            | 309.1 |
| HAN        | 37.2             | 7.1             | 44.3  |
| PAP        | 34.9             | 5.3             | 40.2  |
| RT         | 15.1             | 1.6             | 16.7  |
| NTT        | 52.06            | 5.22            | 57.28 |
| IPH        | 8.6              | 1.1             | 9.7   |
| TT         | 80.8             | 17.2            | 98    |

276

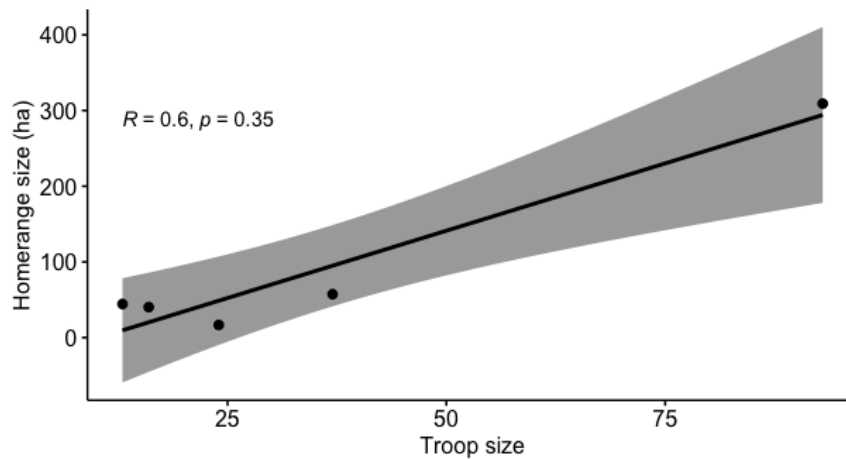

277 **Fig 4.** Correlation between total home range area and total troop size for all troops in Puthuthottam

### 278 Home range Overlap

279 The outer- and core- home ranges of most troops overlapped to a certain degree. There was  
280 relatively less overlap between troop core-home ranges than the outer home range. Figures 4  
281 and 5 depict the pairwise overlap of core- and outer- home ranges respectively. Three troops,  
282 which were primarily observed in the southern part of the forest fragment, showed the most  
283 home range overlap while the two troops near the northern half did not show much overlap.

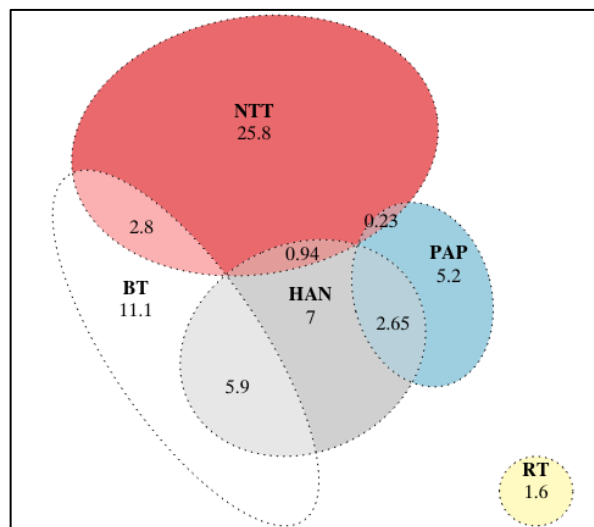

284 **Fig 5.** Pairwise overlap of core-home ranges across all troops present in Puthuthottam. Numbers indicate area in  
285 hectares

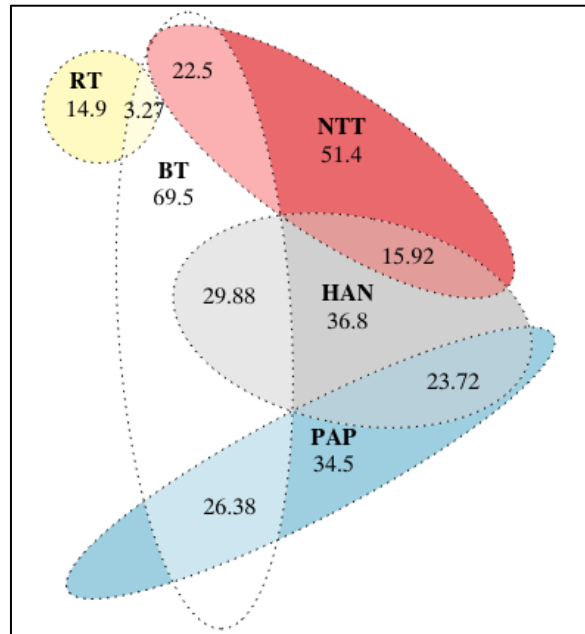

286 **Fig 6.** Pairwise overlap of outer-home ranges across all troops present in Puthuthottam. Numbers indicate area  
 287 in hectares

288 **Degree of Movement**

289 Over the study period, troops moved an average of 393.3 – 722.3m per daily field session  
 290 (Table 2). The two troops that joined to form a single troop, NTT, during the first field season  
 291 moved the most on average per day, however, the largest troop recorded the maximum daily  
 292 path length at 3.8 km on a single day. Overall, daily path length was not significantly correlated  
 293 with troop size ( $R=0.57$ ,  $p=0.2$ ).

294 **Table 2.** Observed degree of movement (m) per day for each troop in Puthuthottam 2018-2021

| TROOP ID | AVERAGE OBSERVED MOVEMENT/ DAY (M) | RANGE OF MOVEMENT/ DAY (M) |
|----------|------------------------------------|----------------------------|
| BT       | 650.5                              | 26.5 - 3774.7              |
| HAN      | 585.3                              | 8.6 - 2467.2               |
| PAP      | 393.3                              | 6.3 - 1256.4               |
| RT       | 468.4                              | 4.7 - 2962.9               |
| NTT      | 722.3                              | 65.1 - 2397.4              |
| IPH      | 285.3                              | 50.6 - 546                 |
| TT       | 721.93                             | 64 - 2565                  |

295  
 296

297 **Habitat Preference**

298 A non-parametric Wilcoxon test revealed a significant difference between density-dependent  
299 randomly generated points and observed macaque locations ( $W=24312$ ;  $p < 0.0001$ ; Figure 7).  
300 The macaques also used human-dominated habitats such as the road and human settlements  
301 disproportionately more than the area available in these habitat types (Figure 8).

302

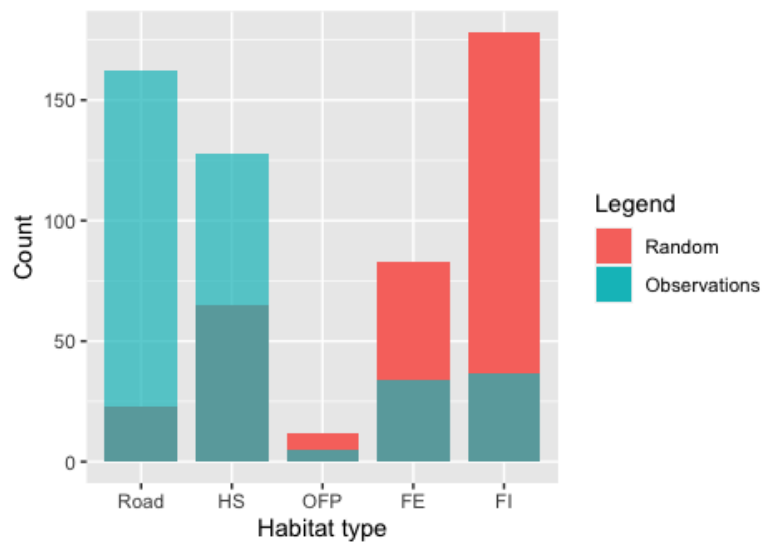

303 **Fig 7.** Randomly generated locations versus observed lion-tailed macaque locations across each habitat type.  
304 HS= Human Settlement; OFP= Open Forest Patch; FE= Forest Edge; FI= Forest Interior

305

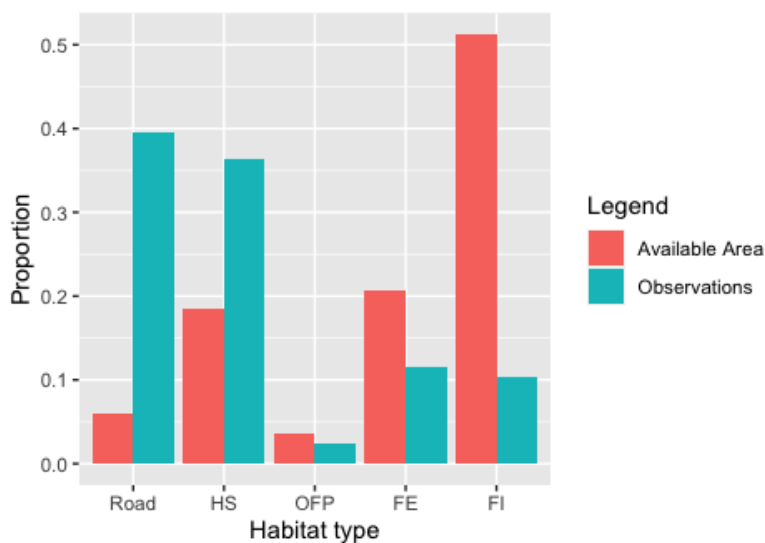

306 **Fig 8.** Available area in each habitat type versus observed lion-tailed macaque locations. HS= Human  
307 Settlement; OFP= Open Forest Patch; FE= Forest Edge; FI= Forest Interior



308

## 309 **Discussion**

310 Each of the five Puthuthottam troops visited human habitation at varying rates, with the largest  
311 troop, BT, visiting most frequently, followed by RT, the newly formed troop in the population.  
312 The HAN troop, which split from the BT troop most recently in 2017 also visited human  
313 habitations relatively frequently. Interestingly, the two smaller troops, IPH and PAP, which  
314 infrequently visited human settlements or the road, both contained a single adult male up until  
315 2016, after which an additional male joined each troop. Both troops were observed to increase  
316 habitation visitation after this time, with IPH mainly frequenting the Iyerpadi Garden Hospital  
317 and some stretches of road towards the north of the fragment, and PAP moving along the edges  
318 of the Valparai town towards the south. The rate at which Puthuthottam monkeys visited houses  
319 and buildings was calculated at 0.43/day in 2001 (Singh et al., 2001) while this study indicates  
320 an increased habitation visitation rate of 0.57/day. Additionally, our measurement, which  
321 required continuous monitoring of the road and settlements, was carried out for a year between  
322 2018-2019; based on our further observations of troops, these rates were noted to increase in  
323 the following years between 2019-2021.

324 All of the five Puthuthottam troops incorporated, into their core- or outer- home range, one or  
325 more of the six human settlements situated within and bordering the Puthuthottam forest  
326 fragment, listed from North to South as follows: Rottikadai, Iyerpadi Garden Hospital, 10-  
327 Acre, Puthuthottam lines, PAP colony and the Valparai town. Energy-rich human-use foods  
328 were, naturally, accessible at each of these settlements, however, Rottikadai, Puthuthottam  
329 lines and the Valparai town contained large areas where garbage was openly disposed and were  
330 presumably the most contested sources for this precious food type. While Rottikadai is a  
331 kilometre to the North of the fragment and requires traversing a dangerous highway, tea fields  
332 and swamps, the Puthuthottam lines and Valparai are located to the South of the fragment,  
333 where we see a corresponding concentration of troop activity. Of the five troops, home ranges  
334 of three were located entirely in the southern half of fragment, and the remaining two troops  
335 maintained home ranges towards the northern half of the fragment.

336 Across taxa, home range size is largely determined by diet, body size and corresponding energy  
337 requirements (Harestad & Bunnell, 1979; McNab, 1963). Within primate species as well, home  
338 range size is dependent on body size and diet, with folivorous and terrestrial species

339 maintaining smaller home ranges than frugivorous and arboreal species (Milton & May, 1976).  
340 Additionally, group-size plays an important role in determining home ranges, most primates  
341 being group-living, with larger groups maintaining larger home ranges, to fulfil the metabolic  
342 requirements of all troop members (Clutton-Brock & Harvey, 1977). The lion-tailed macaque,  
343 an arboreal and primarily frugivorous species, has been reported to maintain a home range size  
344 ranging between 1.25km (Kumar, 1987) to 5km (Green & Minkowski, 1977) in the wild. In  
345 selectively logged forests of Sirsi-Honnava, the reported home range for lion-tailed macaque  
346 groups is a maximum of 3km, with an average daily path length of 500-1500m (Santhosh et  
347 al., 2015). The unique habitat composition of the Puthuthottam forest fragment, however,  
348 creates a hard boundary beyond which troops are unable to move, due to the presence of  
349 impermeable tea plantations and swamps; with the exception of the largest BT troop, which  
350 contains c. 96 individuals, the Puthuthottam troops all showed drastically reduced home range  
351 sizes ranging between 9.7ha to 98ha. Further, the total home range size did not vary  
352 significantly across the five troops, although BT, the largest troop, did maintain the largest  
353 home range. Consequently, the daily path length were also observed to be reduced, ranging  
354 between 285-722m/day, and were also comparable across troops. The ability for this population  
355 to sustain small home ranges, despite requiring much larger areas, is explained by the presence  
356 of easily available human-use foods, which allow individuals to acquire greater energy per unit  
357 food (Altmann & Muruthi, 1988), thus, resulting in a patterns of altered ranging behaviour also  
358 observed in many provisioned species (e.g. Berman et al., 2007; Sengupta et al., 2015; Sinha  
359 & Mukhopadhyay, 2013).

360 Since the Puthuthottam forest fragment restricts macaque movement beyond certain edges,  
361 inter-troop encounters are inevitable. In primates, inter-troop encounters are observed to  
362 typically be agonistic in nature (Dorothy L Cheney, 1987) as they increase inter-group feeding  
363 competition and, thus, directly influence movements of troops (e.g. Spironello, 2001). In this  
364 connection, variations in troop size are thought to be of benefit in defending territories, both in  
365 terms of food resource and mates (Wrangham, 1980), a theory which supports our observations  
366 of a prevailing inter-troop dominance hierarchy in the Puthuthottam population, wherein the  
367 smaller troops tend to avoid encounters with the largest BT troop. A similar trend was also  
368 observed in Amboseli, where a large troop of vervet monkeys expanded their range over those  
369 of smaller troops, restricting them to certain areas (Cheney & Seyfarth, 1987). Previously, the  
370 rate of encounters between troops in Puthuthottam has been reported at 0.1/hour, however, this

371 measure has perhaps increased with the increased troop numbers. We, thus, expected this  
372 highly competitive environment to have led to scramble competition across the troops in the  
373 Puthuthottam, as is often seen with competing primate troops (Isbell, 1991), and evidence from  
374 the present study seems to indicate this is indeed the case. Of the three troops that had relatively  
375 larger overlaps in home range in the southern part of the study site, two were the smallest troops  
376 comprising of 14-16 individuals, allowing them to roam over the same areas without  
377 encountering the largest BT troop often. The two northern troops were also able to avoid  
378 frequent encounters, especially after one troop migrated entirely out of the forest fragment into  
379 neighbouring human settlements, and was able to maintain a core-home range that did not  
380 overlap with any other troop.

381 Finally, while it was evident that human settlements were incorporated in the home ranges of  
382 each of the Puthuthottam troops, it was equally important to determine the extent to which  
383 these habitat types were being used. Other primate species that have been provisioned often  
384 preferentially seek out these resources, thus, gravitating towards human settlements (e.g. Sinha  
385 & Mukhopadhyay, 2013). This preference can be an indicator of the degree to which a species  
386 is dependent on human-use foods, and its vulnerability to the suite of threats that accompany  
387 provisioning. The Puthuthottam troops showed an unfortunate, albeit expected, pattern wherein  
388 human-dominated habitats where human-use foods were easily available, such as the  
389 Puthuthottam Road and Human Settlement, were used disproportionately more than the  
390 available forest habitats, despite these being larger in area. Nevertheless, all troops did use the  
391 Forest Interior and Open Forest Patch habitats where they maintained roosting sites throughout  
392 the study period. A pertinent point to be made is that despite the troops relying on resources  
393 available in human-dominated habitats, the species is still highly dependent on the remaining  
394 natural vegetation, without which the population's survival would be questionable.

395 Dependence on human-use foods has led to many threats faced by individuals of the  
396 Puthuthottam population, some of which are fatal. Singh et al., 2001 reported Puthuthottam  
397 troops crossing the main road at 0.7/day, and once again the current measure is perhaps much  
398 higher. During the three year study period, five deaths were recorded due to collisions with  
399 vehicles on the Puthuthottam Road. Other linear intrusions, such as electric lines passing  
400 through the fragment and human settlements, caused two deaths and two minor electrocutions  
401 in the population. We also observed numerous injuries to the hands and legs of macaques, most

402 likely from manipulating man-made structures in order to access human-use foods, such as  
403 garbage dumpsters, windows and roof tiles. Most importantly, the frequent visits to human  
404 settlements has led to a precipitous human-macaque conflict situation, especially in the two  
405 settlements, Rottikadai and Puthuthottam lines, where home-raiding occurs most often. A  
406 strong presence by the local forest department has averted hunting or retaliatory poisoning  
407 cases, however, local community members have continued to build pressure, calling for the  
408 capture and translocation of macaques. Historically, such measures have not been successful,  
409 leading to the shifting of a problem to a new location, rather than a solution. Furthermore, in  
410 all likelihood, macaques from Puthuthottam could culturally transmit home-raiding tendencies  
411 and the affinity for human-use foods to neighbouring populations, thus, drastically aggravating  
412 the situation. So far, the Puthuthottam population has managed to survive and grow  
413 exponentially with the added help of this new food resource, however, our data (see Chapter  
414 2) shows a gradual steadying of the population as resources become increasingly limited. These  
415 natural underlying processes would perhaps exert the desired control on the population far  
416 better than those offered by further human intervention.

## 417 **References**

- 418  
419 1. Adhikari, J. N., Bhattarai, B. P., & Thapa, T. B. (2018). Human-wild mammal conflict  
420 in a human dominated midhill landscape: a case study from panchase area in Chitwan  
421 Annapurna landscape, Nepal. *Journal of Institute of Science and Technology*, 23(1),  
422 30–38.
- 423 2. Altmann, J., & Muruthi, P. M. (1988). Differences in daily life between  
424 semiprovisioned and wild-feeding baboons. *American Journal of Primatology*, 15,  
425 213–221.
- 426 3. Andren, H. (1994). Effects of habitat fragmentation on birds and mammals in  
427 landscapes with different proportions of suitable habitat: a review. *Oikos*, 71(3), 355–  
428 366.
- 429 4. Berman, C. M., Li, J., Ogawa, H., Ionica, C., & Yin, H. (2007). Primate tourism, range  
430 restriction, and infant risk among *Macaca thibetana* at Mt. Huangshan, China.  
431 *International Journal of Primatology*, 28(5), 1123–1141.
- 432 5. Bladon, R. V., Dickman, C. R., & Hume, I. D. (2002). Effects of habitat fragmentation  
433 on the demography, movements and social organisation of the eastern pygmy-possum  
434 (*Cercartetus nanus*) in northern New South Wales. *Wildlife Research*, 29(1), 105–116.
- 435 6. Bracebridge, C. E., Davenport, T. R. B., Mbofu, V. F., & Marsden, S. J. (2013). Is there  
436 a role for human-dominated landscapes in the long-term conservation management of  
437 the critically endangered kipunji (*Rungwecebus kipunji*)? *International Journal of*  
438 *Primatology*, 34(6), 1122–1136.
- 439 7. Cheney, D. L., & Seyfarth, R. M. (1987). The influence of intergroup competition on  
440 the survival and reproduction of female vervet monkeys. *Behavioral Ecology and*  
441 *Sociobiology*, 21(6), 375–386.

- 442 8. Cheney, Dorothy L. (1987). Interactions and relationships between groups. In: Primate  
443 Societies. University of Chicago Press.
- 444 9. Clutton-Brock, T. H. (1975). Ranging behaviour of red colobus (*Colobus badius*  
445 *tephrosceles*) in the Gombe National Park. *Animal Behaviour*, 23(3), 706–722.
- 446 10. Clutton-Brock, T. H., & Harvey, P. H. (1977). Primate ecology and social organization.  
447 *Journal of Zoology*, 183(1), 1–39.
- 448 11. Defries, R. S., Foley, J. A., & Asner, G. P. (2004). Balancing human needs and  
449 ecosystem function. *Frontiers in Ecology and the Environment*, 2(5), 249–257.
- 450 12. Dhawale, A. K., Kumar, M. A., & Sinha, A. (2020). Changing ecologies, shifting  
451 behaviours: Behavioural responses of a rainforest primate, the lion-tailed macaque  
452 *Macaca silenus*, to a matrix of anthropogenic habitats in southern India. *PLoS ONE*,  
453 15(9), 1–19.
- 454 13. Estrada, A., Raboy, B. E., & Oliveira, L. C. (2012). Agroecosystems and Primate  
455 Conservation in The Tropics: A Review. *American Journal of Primatology*, 74(8), 696–  
456 711.
- 457 14. Estrada, A., Saenz, J., Harvey, C., Naranjo, E., Muñoz, D., & Rosales-Meda, M. (2006).  
458 Primates in agroecosystems: conservation value of some agricultural practices in  
459 mesoamerican landscapes. In: *New Perspectives in the Study of Mesoamerican*  
460 *Primates*, pp. 437–470. Springer, Boston, MA.
- 461 15. Fotheringham, A. S., Brunsdon, C., & Charlton, M. (2000). Quantitative geography:  
462 perspectives on spatial data analysis. Sage.
- 463 16. Ganguly, I., & Chauhan, N. S. (2018). Daily behavioural activity patterns and  
464 reproductive ecology of urban rhesus macaques (*Macaca mulatta*) in human dominated  
465 landscape and its implication in management. *Journal of Applied and Natural Science*,  
466 10(4), 1101–1108.
- 467 17. Gill, R., Saucedo Galvez, C., Aldridge, D., & Morgan, G. (2008). Ranging behaviour  
468 of huemul in relation to habitat and landscape. *Journal of Zoology*, 274(3), 254–260.
- 469 18. Green, R. E., Tyler, G. A., & Bowden, C. G. R. (2000). Habitat selection, ranging  
470 behaviour and diet of the stone curlew (*Burhinus oedicnemus*) in southern England.  
471 *Journal of Zoology*, 250(2), 161–183.
- 472 19. Green, S., & Minkowski, K. (1977). The lion-tailed monkey and its South Indian  
473 rainforest habitat. In *Primate Conservation*. Academic Press, INC.
- 474 20. Greenwood, P. J. (1980). Mating systems, philopatry and dispersal in birds and  
475 mammals. *Animal Behaviour*, 28(4), 1140–1162.
- 476 21. Harestad, A. S., & Bunnell, F. L. (1979). Home range and body weight -- A reevaluation.  
477 *Ecology*, 60(2), 389–402.
- 478 22. Hussain, S., Ram, M. S., Kumar, A., Shivaji, S., & Umapathy, G. (2013). Human  
479 presence increases parasitic load in endangered lion-tailed macaques (*Macaca silenus*)  
480 in its fragmented rainforest habitats in southern India. *PLoS ONE*, 8(5), 1–8.
- 481 23. Irwin, M. T. (2008). Diademed sifaka (*Propithecus diadema*) ranging and habitat use in  
482 continuous and fragmented forest: Higher density but lower viability in fragments?  
483 *Biotropica*, 40(2), 231–240.
- 484 24. Isbell, L. A. (1991). Contest and scramble competition: Patterns of female aggression  
485 and ranging behavior among primates. *Behavioral Ecology*, 2(2), 143–155.
- 486 25. Jakes, A. F., Jones, P. F., Paige, L. C., Seidler, R. G., & Huijser, M. P. (2018). A fence  
487 runs through it: A call for greater attention to the influence of fences on wildlife and  
488 ecosystems. *Biological Conservation*, 227(6), 310–318.
- 489 26. Jaman, M. F., & Huffman, M. A. (2013). The effect of urban and rural habitats and  
490 resource type on activity budgets of commensal rhesus macaques (*Macaca mulatta*) in  
491 Bangladesh. *Primates*, 54(1), 49–59.



- 492 27. Jay, P. (1965). The common langur of North India. In *Primate Behavior. Field Studies*  
493 of Monkeys and Apes, (eds. Holt, Rinehart and Winston). Centre for Advanced Study  
494 in Behavioural Science, Stanford, CA, pp. 197-249.
- 495 28. Jeganathan, P., Mudappa, D., Raman, T. R. S., & Kumar, M. A. (2018). Understanding  
496 perceptions of people towards lion-tailed macaques in a fragmented landscape of the  
497 Anamalai Hills , Western Ghats , India. *Primate Conservation*, 32(11), 205–215.
- 498 29. Kumar, A. (1987). The ecology and population dynamics of the lion-tailed macaque  
499 (*Macaca silenus*) in South India (Doctoral Dissertation). University of Cambridge.
- 500 30. Kumar, A. (2013). The lion-tailed macaque. In *Mammals of South Asia, Volume II*  
501 (eds. Johnsingh, A. J. T. and Manjrekar, N). Universities Press, Hyderabad, pp. 117–  
502 133.
- 503 31. Kumara, H. N., & Singh, M. (2003). Distribution and abundance of primates in rain  
504 forests of the Western Ghats, Karnataka, India. *International Journal of Primatology*,  
505 25(5), 1001–1018.
- 506 32. Kurup, G. U., & Kumar, A. (1993). Time budget and activity patterns of the lion-tailed  
507 macaque (*Macaca silenus*). *International Journal of Primatology*, 14(1), 27–39.
- 508 33. Laver, P. N., & Kelly, M. J. (2008). A critical review of home range studies. *The*  
509 *Journal of Wildlife Management*, 72(1), 290–298.
- 510 34. Levins, R. (1968). *Evolution in changing environments*. Princeton University Press.
- 511 35. Li, C., Zhao, X., Li, D., Garber, P. A., Xiang, Z., Li, M., & Pan, H. (2020). Impact of  
512 cost distance and habitat fragmentation on the daily path length of *Rhinopithecus bieti*.  
513 *PeerJ*, 20(5), 1–18.
- 514 36. Lucherini, M., Lovari, S., & Crema, G. (1995). Habitat use and ranging behaviour of  
515 the red fox (*Vulpes vulpes*) in a Mediterranean rural area: is shelter availability a key  
516 factor? *Journal of Zoology*, 237(4), 577–591.
- 517 37. Magrini, C., Manzo, E., Zapponi, L., Angelici, F. M., Boitani, L., & Cento, M. (2009).  
518 Weasel *Mustela nivalis* spatial ranging behaviour and habitat selection in agricultural  
519 landscape. *Acta Theriologica*, 54(2), 137–146.
- 520 38. Marsh, L. K., & Chapman, C. A. (2013). Fragmentation and its significance on the  
521 conservation of proboscis monkey (*Nasalis larvatus*) in Lower Kinabatangan, Sabah  
522 (North Borneo). In *Primates in Fragments: Complexity and Resilience*, Springer, New  
523 York, NY, pp. 1–539).
- 524 39. Mborra, D. N. M., Wiczowski, J., & Munene, E. (2009). Links between habitat  
525 degradation, and social group size, ranging, fecundity, and parasite prevalence in the  
526 Tana River mangabey (*Cercocebus galeritus*). *American Journal of Physical*  
527 *Anthropology*, 140(3), 562–571.
- 528 40. McNab, B. K. (1963). Bioenergetics and the determination of home range size. *The*  
529 *American Naturalist*, 97(894), 133–140.
- 530 41. Menon, V., Tiwari, S. K., Jahas, S., Ramkumar, K., Rathnakumar, S., Ramith, M.,  
531 Bodhankar, S., & Deb, K. (2013). Staying connected: Addressing the impacts of linear  
532 intrusions on wildlife in the Western Ghats. WTI Report, Wildlife Trust of India, Uttar  
533 Pradesh.
- 534 42. Milton, K., & May, M. L. (1976). Body weight, diet and home range area in primates.  
535 *Nature* 259(5543), 459–462.
- 536 43. Molur, S., Brandon-Jones, D., Dittus, W., Eudey, A., Kumar, A., Singh, M., Feeroz, M.  
537 M., Chalise, M., Priya, P., & Walker, S. (2003). The status of South Asian primates:  
538 conservation assessment and management plan (CAMP) workshop report. Coimbatore:  
539 Zoo Outreach Organisation/CBSG-South Asia.
- 540 44. Moore, J. (1992). Dispersal, nepotism, and primate social behavior. *International*  
541 *Journal of Primatology*, 13(4), 361–378.

- 542 45. Mudappa, D., & Shankar Raman, T. R. (2007). Rainforest restoration and wildlife  
543 conservation on private lands in the Western Ghats. *Making Conservation Work*,  
544 January 2016, 210–240.
- 545 46. Nayak, R., Karanth, K. K., Dutta, T., Defries, R., Karanth, K. U., & Vaidyanathan, S.  
546 (2020). Bits and pieces: Forest fragmentation by linear intrusions in India. *Land Use*  
547 *Policy*, 99(3), 104619.
- 548 47. Nijman, V. (2021). Crop and property damage caused by purple- faced langurs  
549 *Trachypithecus vetulus*. *Journal of Threatened Taxa*, 13(14), e20143–20310.
- 550 48. Pontzer, H., & Kamilar, J. M. (2009). Great ranging associated with greater  
551 reproductive investment in mammals. *Proceedings of the National Academy of*  
552 *Sciences of the United States of America*, 106(1), 192–196.
- 553 49. QGIS, D. T. (2011). Quantum GIS geographic information system. Open Source  
554 Geospatial Foundation Project.
- 555 50. Radhakrishna, S., & Sinha, A. (2011). Less than wild? Commensal primates and  
556 wildlife conservation. *Journal of Biosciences*, 36(5), 749–753.
- 557 51. Ram, S., Venkatachalam, S., & Sinha, A. (2003). Changing social strategies of wild  
558 female bonnet macaques during natural foraging and on provisioning. *Current Science*,  
559 84(6), 780–790.
- 560 52. Richard-Hansen, C. (2000). Translocation of red howler monkeys (*Alouatta seniculus*)  
561 in French Guiana. *Biological Conservation*, 93(2), 247–253.
- 562 53. Riley, E. P. (2007). Flexibility in diet and activity patterns of *Macaca tonkeana* in  
563 response to anthropogenic habitat alteration. *International Journal of Primatology*,  
564 28(1), 107–133.
- 565 54. Rolstad, J. (1999). Consequences of forest fragmentation for the dynamics of bird  
566 populations: conceptual issues and the evidence. *NCASI Technical Bulletin*, 2(781),  
567 149-163.
- 568 55. Salter, R. E., MacKenzie, N. A., Nightingale, N., Aken, K. M., & Chai, P. (1985).  
569 Habitat use, ranging behaviour, and food habits of the proboscis monkey, *Nasalis*  
570 *larvatus* (van Wurmb), in Sarawak. *Primates*, 26(4), 436–451.
- 571 56. Santhosh, K., Kumara, H. N., Velankar, A. D., & Sinha, A. (2015). Ranging Behavior  
572 and Resource Use by Lion-Tailed Macaques (*Macaca silenus*) in Selectively Logged  
573 Forests. *International Journal of Primatology*, 36(2), 288–310.
- 574 57. Sengupta, A., McConkey, K. R., & Radhakrishna, S. (2015). Primates, provisioning  
575 and plants: Impacts of human cultural behaviours on primateecological functions. *PLoS*  
576 *ONE*, 10(11), 1–13.
- 577 58. Singh, M., Kumara, H. N., & Kumar, A. M. (2001). Behavioural responses of lion-  
578 tailed macaques ( *Macaca silenus* ) to a changing habitat in a tropical rain forest  
579 fragment in the Western Ghats, India. *Folia Primatologica*, 72, 278–291.
- 580 59. Singh, M., Singh, M., Kumar, M. A., Kumara, H. N., Sharma, A. K., & Kaumanns, W.  
581 (2002). Distribution, population structure, and conservation of lion-tailed macaques  
582 (*Macaca silenus*) in the Anaimalai Hills, Western Ghats, India. *American Journal of*  
583 *Primatology*, 57(2), 91–102.
- 584 60. Sinha, A. (2001). *The Monkey in the Towns Commons: A Natural History of the Indian*  
585 *Bonnet Macaque*. NIAS Report R 2-01, National Institute of Advanced Studies,  
586 Bangalore.
- 587 61. Sinha, A., & Mukhopadhyay, K. (2013). The monkey in the town's commons, revisited:  
588 an anthropogenic history of the Indian bonnet macaque. In: eds.: Radhakrishna, S,  
589 Huffman, M. A. and Sinha, A *The Macaque Connection: Cooperation and Conflict*  
590 *between Humans and Macaques. Developments in Primatology: Progress and*  
591 *Prospects* pp. 187–208. Springer Science + Business Media.

- 592 62. Sinha, A., Mukhopadhyay, K., Datta-Roy, A., & Ram, S. (2005). Ecology proposes,  
593 behaviour disposes: Ecological variability in social organization and male behavioural  
594 strategies among wild bonnet macaques. *Current Science*, 89(7), 1166–1179.
- 595 63. South, A. (1999). Extrapolating from individual movement behaviour to population  
596 spacing patterns in a ranging mammal. *Ecological Modelling*, 117(23), 343–360.
- 597 64. Spironello, W. R. (2001). The brown capuchin monkey (*Cebus apella*): ecology and  
598 home range requirements in central Amazonia. In *Lessons from Amazonia: The  
599 Ecology and Conservation of a Fragmented Forest* pp. 271–283, Yale University Press.
- 600 65. Tracie, M. (2011). The Effects of Provisioning and Crop-Raiding on the Diet and  
601 Foraging Activities of Human-Commensal White-Faced Capuchins (*Cebus capucinus*).  
602 *American Journal of Primatology*, 73, 439–448.
- 603 66. Umapathy, G., & Kumar, A. (2000). The Demography of the Lion-tailed macaque  
604 (*Macaca silenus*) in rain forest fragments in the Anamalai Hills, South India. *Primates*  
605 41(2), 119–126.
- 606 67. Walker, D., Mcgrady, M., Mccluskie, A., Madders, M., & Mcleod, D. R. A. (2005).  
607 Resident Golden Eagle ranging behaviour before and after construction of a windfarm  
608 in Argyll. *Scottish Bird*, 25(5), 24–40.
- 609 68. Warren, Y., Higham, J. P., Maclarnon, A. M., & Ross, C. (2011). Crop-raiding and  
610 commensalism in olive baboons: the costs and benefits of living with humans. In: eds.:  
611 Sommer, V. and Ross, C. *The Monkeys and Apes of Gashaka: Primate Socio-ecology  
612 and Conservation in Nigeria's Biodiversity Hotspot* pp. 307-332. Springer, New York.
- 613 69. Wiens, J. A., Stenseth, N. C., Horne, B. Van, & Ims, R. A. (1993). Ecological  
614 Mechanisms and Landscape Ecology. *Oikos*, 66(3), 369-380.
- 615 70. Wrangham, R. W. (1980). An ecological model of female-bonded primate groups.  
616 *Behaviour*, 75(3), 262–300.
- 617 71. Yanuar, A., & Chivers, D. J. (2010). Impact of Forest Fragmentation on Ranging and  
618 Home Range of Siamang (*Symphalangus syndactylus*) and Agile Gibbons (*Hylobates  
619 agilis*). In: *Indonesian Primates* pp. 97–119. Springer, New York, NY.
